# Supplementary material
Source: publisher figshare collection journal article supplement (https://frontiersin.figshare.com/ndownloader/files/22186611)
Supplement: Supplementary file [file 22186611]

**Table S1 Summary of the differentially expressed miRNAs in peritoneal macrophages in mice 30-day post infection**

| miRNA           | 30-day post infection | Normal control | log2(Fold_change) | p value   |
|-----------------|-----------------------|----------------|-------------------|-----------|
| mmu-miR-10b-5p  | 195.49                | 3496.71        | -4.16             | 0         |
| mmu-miR-146a-5p | 4559.21               | 100211.64      | -4.46             | 0         |
| mmu-miR-146b-5p | 67690.64              | 30219.22       | 1.16              | 0         |
| mmu-miR-150-5p  | 16077.41              | 37854.40       | -1.24             | 0         |
| mmu-miR-199a-3p | 4309.13               | 312.30         | 3.79              | 0         |
| mmu-miR-203-3p  | 1075.43               | 3785.66        | -1.82             | 0         |
| mmu-miR-21a-5p  | 120627.34             | 42472.13       | 1.51              | 0         |
| mmu-miR-155-5p  | 4014.95               | 759.02         | 2.40              | 0         |
| mmu-miR-22-3p   | 4879.45               | 1118.03        | 2.13              | 0         |
| mmu-miR-23a-3p  | 9614.94               | 3609.26        | 1.41              | 0         |
| mmu-miR-29a-3p  | 15744.36              | 6661.25        | 1.24              | 0         |
| mmu-miR-30d-5p  | 34851.68              | 105612.24      | -1.60             | 0         |
| mmu-miR-3535    | 676.73                | 5408.80        | -3.00             | 0         |
| mmu-miR-672-5p  | 2271.09               | 118.51         | 4.26              | 0         |
| mmu-miR-185-5p  | 985.91                | 3335.47        | -1.76             | 8.10E-304 |
| mmu-miR-423-5p  | 2049.11               | 5025.19        | -1.29             | 1.18E-294 |
| mmu-miR-223-3p  | 3312.31               | 955.30         | 1.79              | 3.18E-293 |
| mmu-miR-365-3p  | 1192.75               | 42.73          | 4.80              | 2.83E-271 |
| mmu-miR-339-5p  | 1975.01               | 351.56         | 2.49              | 1.04E-266 |
| mmu-miR-378a-5p | 1415.61               | 194.29         | 2.87              | 4.02E-223 |
| mmu-miR-148b-3p | 3231.23               | 1190.09        | 1.44              | 8.00E-208 |
| mmu-miR-378c    | 4269.54               | 1901.90        | 1.17              | 1.37E-196 |
| mmu-miR-30b-5p  | 2093.94               | 578.15         | 1.86              | 4.41E-195 |
| mmu-miR-194-5p  | 2252.31               | 670.08         | 1.75              | 5.29E-193 |
| mmu-miR-151-3p  | 1604.55               | 3542.18        | -1.14             | 3.39E-172 |
| mmu-miR-1198-5p | 579.49                | 1758.54        | -1.60             | 1.07E-141 |
| mmu-miR-199b-5p | 616.75                | 35.53          | 4.12              | 1.42E-131 |
| mmu-miR-210-3p  | 672.65                | 60.87          | 3.47              | 3.23E-127 |
| mmu-miR-150-3p  | 156.34                | 876.04         | -2.49             | 5.25E-124 |
| mmu-miR-222-3p  | 1762.93               | 678.03         | 1.38              | 9.07E-107 |
| mmu-miR-320-3p  | 397.83                | 1224.62        | -1.62             | 5.17E-101 |
| mmu-miR-1a-3p   | 63.03                 | 545.85         | -3.11             | 1.56E-97  |
| mmu-miR-1b-5p   | 63.03                 | 545.60         | -3.11             | 1.80E-97  |
| mmu-miR-27a-5p  | 815.74                | 1824.88        | -1.16             | 7.20E-92  |
| mmu-miR-328-3p  | 1190.86               | 402.74         | 1.56              | 9.34E-88  |
| mmu-miR-362-5p  | 600.16                | 97.89          | 2.62              | 4.95E-87  |
| mmu-miR-138-5p  | 372.50                | 2.73           | 7.09              | 3.26E-85  |
| mmu-miR-532-3p  | 461.44                | 45.96          | 3.33              | 5.45E-85  |
| mmu-miR-93-5p   | 1788.98               | 869.09         | 1.04              | 2.27E-69  |
| mmu-miR-183-5p  | 28.38                 | 337.89         | -3.57             | 3.16E-68  |
| mmu-miR-186-5p  | 863.05                | 345.60         | 1.32              | 7.95E-50  |
| mmu-miR-350-3p  | 411.80                | 92.18          | 2.16              | 2.65E-48  |
| mmu-miR-200c-3p | 118.34                | 448.21         | -1.92             | 1.66E-47  |
| mmu-miR-126a-3p | 12.81                 | 213.17         | -4.06             | 2.09E-47  |
| mmu-miR-690     | 5.82                  | 194.04         | -5.06             | 2.65E-47  |
| mmu-miR-148a-5p | 459.11                | 118.51         | 1.95              | 2.89E-47  |
| mmu-miR-17-5p   | 606.71                | 214.91         | 1.50              | 8.30E-43  |
| mmu-miR-1964-3p | 262.74                | 651.19         | -1.31             | 2.15E-40  |
| mmu-miR-182-5p  | 58.23                 | 294.42         | -2.34             | 4.26E-40  |
| mmu-miR-20a-5p  | 612.10                | 249.20         | 1.30              | 7.25E-35  |
| mmu-miR-151-5p  | 507.87                | 195.53         | 1.38              | 5.87E-32  |
| mmu-miR-200a-3p | 541.79                | 219.63         | 1.30              | 2.82E-31  |
| mmu-miR-582-3p  | 126.93                | 3.98           | 5.00              | 7.40E-31  |
| mmu-miR-484     | 543.54                | 223.36         | 1.28              | 1.16E-30  |

|                   |        |        |       |            |
|-------------------|--------|--------|-------|------------|
| mmu-miR-451a      | 305.10 | 637.78 | -1.06 | 3.61E-29   |
| mmu-miR-99b-5p    | 140.91 | 383.36 | -1.44 | 4.87E-28   |
| mmu-miR-146b-3p   | 174.68 | 27.83  | 2.65  | 6.34E-27   |
| mmu-miR-500-3p    | 183.85 | 31.80  | 2.53  | 6.45E-27   |
| mmu-miR-107-3p    | 361.29 | 132.67 | 1.45  | 6.96E-25   |
| mmu-miR-10a-3p    | 216.74 | 53.67  | 2.01  | 4.31E-24   |
| mmu-miR-326-3p    | 129.84 | 14.66  | 3.15  | 5.14E-24   |
| mmu-miR-362-3p    | 104.22 | 6.71   | 3.96  | 3.71E-23   |
| mmu-miR-98-5p     | 438.58 | 195.03 | 1.17  | 8.69E-22   |
| mmu-miR-322-5p    | 93.60  | 5.71   | 4.03  | 3.42E-21   |
| mmu-miR-322-3p    | 202.19 | 54.41  | 1.89  | 6.55E-21   |
| mmu-miR-511-3p    | 78.17  | 1.74   | 5.49  | 5.88E-20   |
| mmu-let-7e-5p     | 71.91  | 221.87 | -1.63 | 9.69E-20   |
| mmu-miR-29b-3p    | 184.14 | 49.19  | 1.90  | 2.56E-19   |
| mmu-miR-22-5p     | 473.08 | 233.05 | 1.02  | 5.54E-19   |
| mmu-miR-132-5p    | 21.83  | 121.00 | -2.47 | 1.81E-18   |
| mmu-miR-5121      | 10.19  | 88.45  | -3.12 | 3.17E-17   |
| mmu-miR-486a-3p   | 143.82 | 317.27 | -1.14 | 6.41E-17   |
| mmu-miR-30a-3p    | 421.99 | 208.95 | 1.01  | 6.56E-17   |
| mmu-miR-206-3p    | 0.00   | 62.61  | -6.16 | 1.60E-16   |
| mmu-miR-486b-3p   | 141.05 | 308.58 | -1.13 | 2.99E-16   |
| mmu-miR-486a-5p   | 148.48 | 317.27 | -1.10 | 5.86E-16   |
| mmu-miR-155-3p    | 6.40   | 72.05  | -3.49 | 1.36E-15   |
| mmu-miR-15a-5p    | 118.34 | 25.84  | 2.20  | 2.56E-15   |
| mmu-miR-3068-3p   | 152.99 | 43.98  | 1.80  | 3.45E-15   |
| mmu-miR-339-3p    | 178.17 | 59.63  | 1.58  | 1.04E-14   |
| mmu-miR-34a-5p    | 75.40  | 8.45   | 3.16  | 1.21E-14   |
| mmu-miR-28a-5p    | 194.33 | 75.78  | 1.36  | 5.98E-13   |
| mmu-miR-133a-3p   | 4.08   | 54.91  | -3.75 | 8.06E-13   |
| mmu-miR-140-5p    | 290.84 | 142.86 | 1.03  | 2.51E-12   |
| mmu-miR-582-5p    | 44.98  | 0.00   | 6.49  | 5.14E-12   |
| mmu-miR-3068-5p   | 101.31 | 25.59  | 1.99  | 7.10E-12   |
| mmu-miR-193a-5p   | 70.31  | 11.18  | 2.65  | 9.13E-12   |
| mmu-miR-378b      | 119.36 | 37.76  | 1.66  | 5.12E-11   |
| mmu-miR-450a-5p   | 64.63  | 10.19  | 2.67  | 5.53E-11   |
| mmu-miR-338-5p    | 135.23 | 48.70  | 1.47  | 1.60E-10   |
| mmu-miR-3065-3p   | 128.53 | 44.97  | 1.52  | 1.91E-10   |
| mmu-miR-125a-5p   | 62.16  | 149.57 | -1.27 | 5.04E-10   |
| mmu-miR-143-3p    | 88.94  | 185.35 | -1.06 | 1.72E-09   |
| mmu-miR-330-3p    | 12.52  | 60.62  | -2.28 | 3.24E-09   |
| mmu-miR-125b-2-3p | 106.99 | 38.76  | 1.46  | 1.48E-08   |
| mmu-miR-1941-3p   | 34.21  | 3.73   | 3.20  | 1.73E-07   |
| mmu-miR-669a-5p   | 63.76  | 17.89  | 1.83  | 2.59E-07   |
| mmu-miR-365-2-5p  | 34.21  | 4.22   | 3.02  | 3.67E-07   |
| mmu-miR-342-5p    | 25.04  | 73.04  | -1.54 | 4.86E-07   |
| mmu-miR-31-5p     | 2.18   | 26.83  | -3.62 | 7.74E-07   |
| mmu-miR-503-5p    | 44.25  | 9.19   | 2.27  | 8.00E-07   |
| mmu-miR-501-5p    | 29.11  | 2.98   | 3.29  | 1.06E-06   |
| mmu-miR-1839-3p   | 62.74  | 19.88  | 1.66  | 1.96E-06   |
| mmu-miR-511-5p    | 24.31  | 1.74   | 3.81  | 2.31E-06   |
| mmu-miR-708-5p    | 20.82  | 0.00   | 4.80  | 3.34E-06   |
| mmu-miR-5114      | 4.22   | 29.32  | -2.80 | 3.99E-06   |
| mmu-miR-425-3p    | 113.98 | 54.91  | 1.05  | 7.31E-06   |
| mmu-miR-210-5p    | 24.02  | 2.48   | 3.27  | 9.66E-06   |
| mmu-miR-92a-1-5p  | 23.58  | 60.13  | -1.35 | 3.52E-05   |
| mmu-miR-708-3p    | 29.99  | 6.71   | 2.16  | 8.10E-05   |
| mmu-miR-664-3p    | 86.03  | 41.49  | 1.05  | 9.99E-05   |
| mmu-miR-5099      | 4.66   | 24.60  | -2.40 | 0.00010032 |

|                  |       |       |       |            |
|------------------|-------|-------|-------|------------|
| mmu-miR-205-5p   | 19.36 | 2.48  | 2.96  | 0.00015    |
| mmu-miR-3065-5p  | 29.11 | 7.45  | 1.97  | 0.00026155 |
| mmu-miR-338-3p   | 29.11 | 7.45  | 1.97  | 0.00026155 |
| mmu-miR-1949     | 3.78  | 20.87 | -2.46 | 0.00027714 |
| mmu-miR-5107-5p  | 5.68  | 24.60 | -2.12 | 0.00031076 |
| mmu-miR-212-5p   | 4.95  | 22.61 | -2.19 | 0.00040981 |
| mmu-miR-29c-3p   | 36.54 | 12.42 | 1.56  | 0.00053139 |
| mmu-miR-363-5p   | 3.64  | 18.88 | -2.38 | 0.00070551 |
| mmu-miR-29b-1-5p | 7.42  | 25.84 | -1.80 | 0.00087533 |
| mmu-miR-503-3p   | 34.79 | 12.17 | 1.51  | 0.00092414 |
| mmu-miR-148b-5p  | 61.43 | 30.06 | 1.03  | 0.0012291  |
| mmu-miR-3086-5p  | 1.60  | 13.17 | -3.04 | 0.0012865  |
| mmu-miR-152-5p   | 34.50 | 13.17 | 1.39  | 0.0020179  |
